# Supplementary material for: First applications of a targeted exome sequencing approach in fetuses with ultrasound abnormalities reveals an important fraction of cases with associated gene defects
Source: PeerJ. 2016 Apr 26;4:e1955. doi: 10.7717/peerj.1955 (PMC4860337; doi:10.7717/peerj.1955)
Supplement: Table S2 — Whole exome sequencing coverage analysis metrics for each case. [file peerj-04-1955-s002.xlsx]

## Sheet: Case 1
	Case 1 Analysis Report
	Number of mapped reads	51,807,810
	Percent reads on target	96.15%
	Average base coverage depth	142.8
	Uniformity of base coverage	90.71%
	Amplicon Read Coverage
	Number of amplicons	293.903
	Percent assigned amplicon reads	96.15%
	Average reads per amplicon	169.5
	Uniformity of amplicon coverage	91.66%
	Amplicons with at least 1 read	99.64%
	Amplicons with at least 20 reads	95.47%
	Amplicons with at least 100 reads	68.13%
	Amplicons with at least 500 reads	1.13%
	Amplicons with no strand bias	94.27%
	Amplicons reading end-to-end	17.52%
	Target Base Coverage
	Bases in target regions	57,742,646
	Percent base reads on target	95.47%
	Average base coverage depth	142.8
	Uniformity of base coverage	90.71%
	Target base coverage at 1x	99.41%
	Target base coverage at 20x	93.81%
	Target base coverage at 100x	58.76%
	Target base coverage at 500x	0.82%
	Target bases with no strand bias	77.70%
	Percent end-to-end reads	48.33%

## Sheet: Case 2
	Case 2 Analysis Report
	Number of mapped reads	70,957,680
	Percent reads on target	95.61%
	Average base coverage depth	211.9
	Uniformity of base coverage	92.40%
	Amplicon Read Coverage
	Number of amplicons	293.903
	Percent assigned amplicon reads	95.61%
	Average reads per amplicon	230.8
	Uniformity of amplicon coverage	93.15%
	Amplicons with at least 1 read	99.74%
	Amplicons with at least 20 reads	97.41%
	Amplicons with at least 100 reads	80.61%
	Amplicons with at least 500 reads	4.75%
	Amplicons with no strand bias	94.78%
	Amplicons reading end-to-end	48.14%
	Target Base Coverage
	Bases in target regions	57,742,646
	Percent base reads on target	94.94%
	Average base coverage depth	211.9
	Uniformity of base coverage	92.40%
	Target base coverage at 1x	99.55%
	Target base coverage at 20x	96.73%
	Target base coverage at 100x	76.70%
	Target base coverage at 500x	3.98%
	Target bases with no strand bias	87.25%
	Percent end-to-end reads	65.81%

## Sheet: Case 3
	Case 3 Analysis Report
	Number of mapped reads	55,793,281
	Percent reads on target	96.58%
	Average base coverage depth	165.0
	Uniformity of base coverage	91.18%
	Amplicon Read Coverage
	Number of amplicons	293.903
	Percent assigned amplicon reads	96.58%
	Average reads per amplicon	183.3
	Uniformity of amplicon coverage	91.67%
	Amplicons with at least 1 read	99.66%
	Amplicons with at least 20 reads	96.33%
	Amplicons with at least 100 reads	69.16%
	Amplicons with at least 500 reads	2.12%
	Amplicons with no strand bias	95.07%
	Amplicons reading end-to-end	38.39%
	Target Base Coverage
	Bases in target regions	57,742,646
	Percent base reads on target	95.76%
	Average base coverage depth	165.0
	Uniformity of base coverage	91.18%
	Target base coverage at 1x	99.49%
	Target base coverage at 20x	95.43%
	Target base coverage at 100x	64.06%
	Target base coverage at 500x	2.01%
	Target bases with no strand bias	84.47%
	Percent end-to-end reads	58.61%

## Sheet: Case 4
	Case 4 Analysis Report
	Number of mapped reads	49,922,629
	Percent reads on target	96.59%
	Average base coverage depth	149.6
	Uniformity of base coverage	90.01%
	Amplicon Read Coverage
	Number of amplicons	293.903
	Percent assigned amplicon reads	96.59%
	Average reads per amplicon	164.1
	Uniformity of amplicon coverage	90.82%
	Amplicons with at least 1 read	99.47%
	Amplicons with at least 20 reads	94.97%
	Amplicons with at least 100 reads	63.27%
	Amplicons with at least 500 reads	2.18%
	Amplicons with no strand bias	91.72%
	Amplicons reading end-to-end	42.00%
	Target Base Coverage
	Bases in target regions	57,742,646
	Percent base reads on target	95.73%
	Average base coverage depth	149.6
	Uniformity of base coverage	90.01%
	Target base coverage at 1x	99.27%
	Target base coverage at 20x	93.80%
	Target base coverage at 100x	58.11%
	Target base coverage at 500x	1.73%
	Target bases with no strand bias	83.35%
	Percent end-to-end reads	63.35%

## Sheet: Case 5
	Case 5 Analysis Report
	Number of mapped reads	49,205,332
	Percent reads on target	95.93%
	Average base coverage depth	125.8
	Uniformity of base coverage	92.02%
	Amplicon Read Coverage
	Number of amplicons	293.903
	Percent assigned amplicon reads	95.93%
	Average reads per amplicon	160.6
	Uniformity of amplicon coverage	93.08%
	Amplicons with at least 1 read	99.61%
	Amplicons with at least 20 reads	96.12%
	Amplicons with at least 100 reads	67.62%
	Amplicons with at least 500 reads	0.44%
	Amplicons with no strand bias	93.66%
	Amplicons reading end-to-end	6.01%
	Target Base Coverage
	Bases in target regions	57,742,646
	Percent base reads on target	95.28%
	Average base coverage depth	125.8
	Uniformity of base coverage	92.02%
	Target base coverage at 1x	99.33%
	Target base coverage at 20x	93.93%
	Target base coverage at 100x	53.89%
	Target base coverage at 500x	0.28%
	Target bases with no strand bias	68.42%
	Percent end-to-end reads	35.07%

## Sheet: Case 6
	Case 6 Analysis Report
	Number of mapped reads	54,855,037
	Percent reads on target	82.59%
	Average base coverage depth	132.6
	Uniformity of base coverage	92.52%
	Amplicon Read Coverage
	Number of amplicons	293.903
	Percent assigned amplicon reads	82.59%
	Average reads per amplicon	154.2
	Uniformity of amplicon coverage	93.45%
	Amplicons with at least 1 read	99.78%
	Amplicons with at least 20 reads	96.24%
	Amplicons with at least 100 reads	66.91%
	Amplicons with at least 500 reads	0.31%
	Amplicons with no strand bias	93.04%
	Amplicons reading end-to-end	24.23%
	Target Base Coverage
	Bases in target regions	57,742,646
	Percent base reads on target	85.48%
	Average base coverage depth	132.6
	Uniformity of base coverage	92.52%
	Target base coverage at 1x	99.56%
	Target base coverage at 20x	94.70%
	Target base coverage at 100x	57.63%
	Target base coverage at 500x	0.35%
	Target bases with no strand bias	79.10%
	Percent end-to-end reads	52.07%

## Sheet: Case 7
	Case 7 Analysis Report
	Number of mapped reads	34,743,549
	Percent reads on target	89.18%
	Average base coverage depth	93.85
	Uniformity of base coverage	91.57%
	Amplicon Read Coverage
	Number of amplicons	293.903
	Percent assigned amplicon reads	0.8918
	Average reads per amplicon	105.4
	Uniformity of amplicon coverage	0.9229
	Amplicons with at least 1 read	99.73%
	Amplicons with at least 20 reads	92.83%
	Amplicons with at least 100 reads	45.61%
	Amplicons with at least 500 reads	0.15%
	Amplicons with no strand bias	93.52%
	Amplicons reading end-to-end	35.07%
	Target Base Coverage
	Bases in target regions	57,742,646
	Percent base reads on target	90.45%
	Average base coverage depth	93.85
	Uniformity of base coverage	91.57%
	Target base coverage at 1x	99.52%
	Target base coverage at 20x	90.85%
	Target base coverage at 100x	37.82%
	Target base coverage at 500x	0.16%
	Target bases with no strand bias	82.56%
	Percent end-to-end reads	57.34%

## Sheet: Case 8
	Case 8 Analysis Report
	Number of mapped reads	50,477,593
	Percent reads on target	89.36%
	Average base coverage depth	128.2
	Uniformity of base coverage	83.43%
	Amplicon Read Coverage
	Number of amplicons	293.903
	Percent assigned amplicon reads	89.36%
	Average reads per amplicon	153.5
	Uniformity of amplicon coverage	84.53%
	Amplicons with at least 1 read	99.62%
	Amplicons with at least 20 reads	90.11%
	Amplicons with at least 100 reads	57.90%
	Amplicons with at least 500 reads	1.41%
	Amplicons with no strand bias	92.30%
	Amplicons reading end-to-end	16.72%
	Target Base Coverage
	Bases in target regions	57,742,646
	Percent base reads on target	90.67%
	Average base coverage depth	128.2
	Uniformity of base coverage	83.43%
	Target base coverage at 1x	99.30%
	Target base coverage at 20x	86.80%
	Target base coverage at 100x	50.13%
	Target base coverage at 500x	0.94%
	Target bases with no strand bias	78.61%
	Percent end-to-end reads	48.95%

## Sheet: Case 9
	Case 9 Analysis Report
	Number of mapped reads	40,289,782
	Percent reads on target	84.43%
	Average base coverage depth	97.72
	Uniformity of base coverage	91.52%
	Amplicon Read Coverage
	Number of amplicons	293.903
	Percent assigned amplicon reads	84.43%
	Average reads per amplicon	115.7
	Uniformity of amplicon coverage	92.51%
	Amplicons with at least 1 read	99.57%
	Amplicons with at least 20 reads	93.73%
	Amplicons with at least 100 reads	51.20%
	Amplicons with at least 500 reads	0.09%
	Amplicons with no strand bias	92.79%
	Amplicons reading end-to-end	18.11%
	Target Base Coverage
	Bases in target regions	57,742,646
	Percent base reads on target	86.62%
	Average base coverage depth	97.72
	Uniformity of base coverage	91.52%
	Target base coverage at 1x	99.28%
	Target base coverage at 20x	91.28%
	Target base coverage at 100x	40.44%
	Target base coverage at 500x	0.07%
	Target bases with no strand bias	77.02%
	Percent end-to-end reads	48.26%

## Sheet: Case 10
	Case 10 Analysis Report
	Number of mapped reads	44,938,312
	Percent reads on target	86.17%
	Average base coverage depth	114.7
	Uniformity of base coverage	90.20%
	Amplicon Read Coverage
	Number of amplicons	293.903
	Percent assigned amplicon reads	86.17%
	Average reads per amplicon	131.7
	Uniformity of amplicon coverage	91.10%
	Amplicons with at least 1 read	99.60%
	Amplicons with at least 20 reads	93.64%
	Amplicons with at least 100 reads	55.71%
	Amplicons with at least 500 reads	0.35%
	Amplicons with no strand bias	92.33%
	Amplicons reading end-to-end	27.62%
	Target Base Coverage
	Bases in target regions	57,742,646
	Percent base reads on target	87.92%
	Average base coverage depth	114.7
	Uniformity of base coverage	90.20%
	Target base coverage at 1x	99.35%
	Target base coverage at 20x	91.71%
	Target base coverage at 100x	47.44%
	Target base coverage at 500x	0.30%
	Target bases with no strand bias	79.19%
	Percent end-to-end reads	53.95%

[truncated: 5 more sheets: Case 11, Case 12, Case 13, Case 14, Sheet1]
